# SPT6 loss Permits the Transdifferentiation of Keratinocytes into an Intestinal Fate that Recapitulates Barrett's Metaplasia

## Authors:

Daniella T. Vo<sup>1</sup>, MacKenzie R. Fuller<sup>2, 3</sup>, Courtney Tindle<sup>2, 3</sup>, Mahitha Anandachar<sup>4</sup>, Soumita Das<sup>3-5\*</sup>, Debashis Sahoo<sup>1, 5-6\*</sup> and Pradipta Ghosh<sup>2, 3, 5, 6\*</sup>

## Affiliations:

<sup>1</sup> Department of Pediatrics, University of California San Diego.

<sup>2</sup> Department of Cellular and Molecular Medicine, University of California San Diego.

<sup>3</sup> HUMANOID Center of Research Excellence (CoRE), University of California San Diego.

<sup>4</sup> Department of Pathology, University of California San Diego.

<sup>5</sup> Department of Computer Science and Engineering, Jacob's School of Engineering,  
University of California San Diego.

<sup>6</sup> Moore Comprehensive Cancer Center, University of California San Diego.

<sup>7</sup> Department of Medicine, University of California San Diego.

## \*CORRESPONDING AUTHORS

**Debashis Sahoo, Ph.D.;** Assistant Professor, Department of Pediatrics, University of California San Diego; 9500 Gilman Drive, MC 0730, Leichtag Building 132; La Jolla, CA 92093-0831. **Phone:** 858-246-1803; **Fax:** 858-246-0019; **Email:** [dsahoo@ucsd.edu](mailto:dsahoo@ucsd.edu)

**Soumita Das, Ph.D.;** Associate Professor, Department of Pathology, University of California San Diego; 9500 Gilman Drive, George E. Palade Bldg, Rm 256; La Jolla, CA 92093. **Phone:** 858-246-2062; **Email:** [sodas@ucsd.edu](mailto:sodas@ucsd.edu)

**Pradipta Ghosh, M.D.;** Professor, Departments of Medicine and Cell and Molecular Medicine, University of California San Diego; 9500 Gilman Drive (MC 0651), George E. Palade Bldg, Rm 232; La Jolla, CA 92093. **Phone:** 858-822-7633; **Email:** [prghosh@ucsd.edu](mailto:prghosh@ucsd.edu)

## SUMMARY

Transient depletion of the transcription elongation factor SPT6 in the keratinocyte has been recently shown to inhibit epidermal differentiation and stratification; instead, they transdifferentiate into a gut-like lineage. We show here that this phenomenon of *transdifferentiation* recapitulates Barrett's metaplasia, the only human pathophysiologic condition in which a stratified squamous epithelium that is injured due to chronic acid reflux is trans-committed into an intestinal fate. The evidence we present here not only pinpoint the keratinocyte as the cell of origin of Barrett's metaplasia, but also provide mechanistic insights linking chronic acid injury, downregulation of SPT6, loss of epidermal fate and metaplastic progression. Because Barrett's metaplasia in the esophagus (BE) is a pre-neoplastic condition with no preclinical human models, these findings have a profound impact on the modeling Barrett's metaplasia-in-a-dish.

## INTRODUCTION

The stratified squamous epithelium, which is comprised mainly of keratinocytes, acts as a physical barrier and is replaced every few weeks by resident stem cells residing in the basal layer<sup>1,2</sup>. Besides our skin, stratified squamous epithelia form barriers to antigens in the oral cavity and oral pharynx including the palatine and lingual tonsils, the anal canal, the male foreskin, and the female vagina and ectocervix. Recently, it has been shown<sup>1</sup> that in epidermal stem and progenitor cells, ~a third of the genes that are induced during differentiation already contain stalled Pol II at the promoters which is then released into productive transcription elongation upon differentiation. Using a combination of Pol II ChIP Seq and RNAi screen, SPT6 was identified as one of the critical mediators of such elongation<sup>1</sup>. SPT6-depleted keratinocytes fail to differentiate into stratified squamous epithelium; instead, they transdifferentiate into intestine-like lineage (by morphology and gene expression analysis; **Figure 1A-B**). The basis of the claim rested in part on morphological characteristics in 3D growth and in part on the list of genes that were upregulated  $\geq 10$ -fold in small interfering RNA (siRNA)-depleted (si)SPT6 samples compared to controls (a.k.a SPT6-depleted 472-gene signature; GSE153129) to query the Human Gene Atlas and ARCHS<sup>4</sup>; the latter is a web-based resource that provides access to human and mouse transcriptomic datasets from GEO and SRA<sup>1</sup>. Mechanistically, depletion of SPT6 resulted in stalled transcription of the master regulator of epidermal fate *p63*<sup>3-6</sup>. Studies in SPT6-depleted keratinocytes that were subsequently rescued with exogenous expression of *p63* suggested that SPT6 favors the differentiation into stratified squamous and arrests the intestinal phenotype through the control of transcriptional elongation of *p63* and its targets. Despite the mechanistic insights into how SPT6 regulates keratinocyte fate, the translational relevance of the observed transdifferentiation of keratinocytes into an intestinal fate remained unknown.

Among the various organs that are protected by stratified squamous epithelium, the only human pathophysiologic condition in which a stratified squamous epithelium in adults transdifferentiates into intestinal fate is that described in the foregut, a phenomenon termed Barrett's metaplasia<sup>8</sup> of the esophagus (BE). BE develops when the non-keratinized stratified squamous epithelium in the lower esophagus is replaced by a single layer of intestine-like cells after a prolonged phase of injury due to chronic acid reflux. The origin of BE remains widely debated; theories include a direct origin from the esophageal stratified squamous epithelium, or by proximal migration and subsequent intestinalization of the gastric epithelium. Alternative proposals include a niche cell at the squamocolumnar junction, or cells lining the esophageal gland ducts, or circulating bone-marrow-derived cells. Much of these theories originate from experimental models, and to date, there are no models that recapitulate the process of transdifferentiation of the epithelial lining that is the pathognomonic feature of BE. Despite the dispute surrounding the origin of BE, what is undisputed is that it represents a *bona fide* preneoplastic state; patients with BE have a ~40-125 times higher risk of esophageal adenocarcinoma than the general population<sup>9</sup>. We hypothesized that the phenomenon of transdifferentiation from stratified squamous to an intestinal fate in SPT6-depleted keratinocytes may resemble and recapitulate the fundamental molecular and cellular aspects of keratinocyte transcommitment in BE.

## RESULTS

### *SPT6 loss resembles Barrett's esophagus:*

We carried out a comprehensive bidirectional analysis-- DEGs (both, up- and downregulated genes<sup>2</sup>) in BE vs. normal esophagus (**Figure 1C**) were used to rank order the control vs. SPT6-depleted samples, and conversely, DEGs in control vs. SPT6-depleted samples were analyzed in all BE datasets publicly available on NCBI as of February 1, 2021 (**Figure 1D**). We found that the combined DEGs (up- and downregulated genes in BE<sup>2</sup>; **Figure 1E**) as well as the individual up-/downregulated genes (**Figure 1F-G**) were able to independently classify the control and SPT6-depleted samples with perfection (ROC AUC 1.00). The converse was also true, i.e., the combined DEGs (up- and downregulated genes in SPT6-depleted samples; **Figure 1H**) as well as the individual up-/downregulated signatures (**Figure 1I-J**) were independently able to classify the normal esophageal and BE samples across several independent human datasets. Downregulated genes consistently performed better (ROC AUC ranges from 0.56 – 1.00 in UP-genes, I, and 0.84 - 1.00 in DOWN-genes, J). The DEGs from the SPT6-depleted samples also perfectly classified the BE samples derived from mice lacking *p63* (**Figure 1H-J**); *p63*<sup>-/-</sup> mice are the only genetic model of BE known to date<sup>11</sup>. Finally, a Pearson correlation matrix revealed that SPT6-depleted samples clustered much closer to BE tissues than to colon (correlation coefficient 0.86-0.90 to BE vs. 0.76-0.8 to colon; **Figure 1K**). These findings demonstrate that the transcriptional profile of the SPT6-depleted keratinocyte is more similar to BE than colon or any other tissue type tested.

### *SPT6 loss resembles intestinal metaplasia, not healthy differentiation:*

Prior studies have linked loss of *p63*, the master regulator of keratinocyte proliferation and differentiation into a stratified lining<sup>3-6</sup>, as a state that is permissive to the transdifferentiation of stratified squamous epithelium into intestine-like metaplasia. In *p63*<sup>-/-</sup> mice, the stratified lining of both trachea and esophagus are replaced by a highly ordered, columnar ciliated epithelium that is deficient in basal cells<sup>7</sup>. In the same mice, under conditions of programmed damage to the esophageal lining, progenitor cells at the gastroesophageal junction serve as precursors of Barrett's metaplasia<sup>11</sup>. SPT6 loss in keratinocytes was also associated with a functional loss of *p63*<sup>1</sup>; without SPT6, levels of *p63* protein were diminished, and *p63*-binding sites on the genome were closed, as determined using ATAC seq<sup>1</sup>. Thus, both the SPT6-depleted primary human keratinocyte model and the *p63*<sup>-/-</sup> mouse model relies upon a final common pathway that escapes an epidermal fate; both lack functional *p63*. We noted that in the *p63*<sup>-/-</sup> mouse model of BE, Wang et. al, had further delineated that despite the overall similarities, BE segment and intestine tissues have key differences: a set of metaplasia-specific genes is enriched in BE, whereas a set of intestine-specific genes is enriched in the intestine (**Figure 2A**). Gene set enrichment analyses found these differences also in human BE vs. small intestine tissues (GSE13083<sup>13</sup>; **Figure 2B**) and in the SPT6-depleted keratinocyte organoid model reported by Li et al. vs. small intestine-derived organoids (**Figure 2C**). These findings further support our argument that SPT6 depletion does not merely trigger intestinal transdifferentiation; it induces metaplasia-specific genes in the setting of de-enrichment of intestine-specific genes.

### *Acid exposure suppresses SPT6 in keratinocytes:*

Because BE is a consequence of prolonged acid exposure<sup>8</sup>, we next asked what, if any, might be the impact of low pH on the levels of SPT6 expression in keratinocytes. We found that SPT6 transcripts are downregulated in immortalized esophageal keratinocytes exposed to acid (**Figure 2D**). Prior work has also shown that exposure of esophageal keratinocytes to bile and acid causes a reduction in p63<sup>9</sup>. When we exposed primary keratinocytes (same cell line used by Li et al. <sup>1</sup>) to pH 4.5, we found that both SPT6 and TP63 transcripts were reduced (**Figure 2E**). Most importantly, reduced SPT6 transcript in these cells translated to reduced SPT6 protein in a pH-dependent manner (**Figure 2F**). These findings help link the SPT6→p63 mechanism(s) outlined by Li et al., to one of the most definitive physiologic triggers of BE (i.e., acid).

### *Conclusion:*

Our findings augment the impact of the discoveries reported by Li et al.<sup>1</sup>, by three-fold: (i) *First*, they validate transient SPT6-depletion in keratinocytes as an effective strategy for studying origin of BE. Although organoids derived from segments of established BE have been successfully grown in long-term cultures<sup>10</sup>, attempts to model the initiation of BE had thus far been unsuccessful<sup>16</sup>. (ii) *Second*, they weigh in on the long-standing debate surrounding the cell of origin in BE. Controversies exist as to whether BE results from a direct conversion of differentiated cells *via* a process called transdifferentiation, or whether BE develops from niche stem or progenitor cells at the gastroesophageal junction<sup>12,13</sup>. The evidence presented by Li et al. argues strongly for keratinocyte transdifferentiation or transcommitment as the mechanism. (iii) *Third*, our findings, together with the evidence provided by Li et al. suggest a mechanism for initiation of BE while being able to connect the dots between physiological triggers of the disease, i.e., chronic acid reflux (**Figure 2G**). For example, acid exposure has been shown to promote intestinal differentiation in both BE explants<sup>19</sup> and BE-derived adenocarcinoma cell lines<sup>20</sup>, and here we show that acid exposure reduces SPT6 mRNA and protein in a dose dependent manner. Another intriguing coincidence is that SPT6 is located on Chr 17q11.2, and loss of heterozygosity (LOH) at this locus is frequently encountered in BE-associated adenocarcinomas<sup>16,17</sup>, representing one of the most frequent LOH in BE<sup>23</sup>. Notably, loss of p53, which is located on Chr 17p13, signals risk for BE to adenocarcinoma progression<sup>19</sup>. By contrast, microdeletions in the distal Chr 17q has been proposed as early event in BE initiation<sup>25</sup>. Because microsatellites might be sensitive indicators of disrupted mechanisms and indicate a propensity to mutagenesis, it is tempting to speculate that microdeletions at Chr17q11.2 could impact SPT6 expression and trigger the transdifferentiation of keratinocytes into BE.

## Figures and Legends

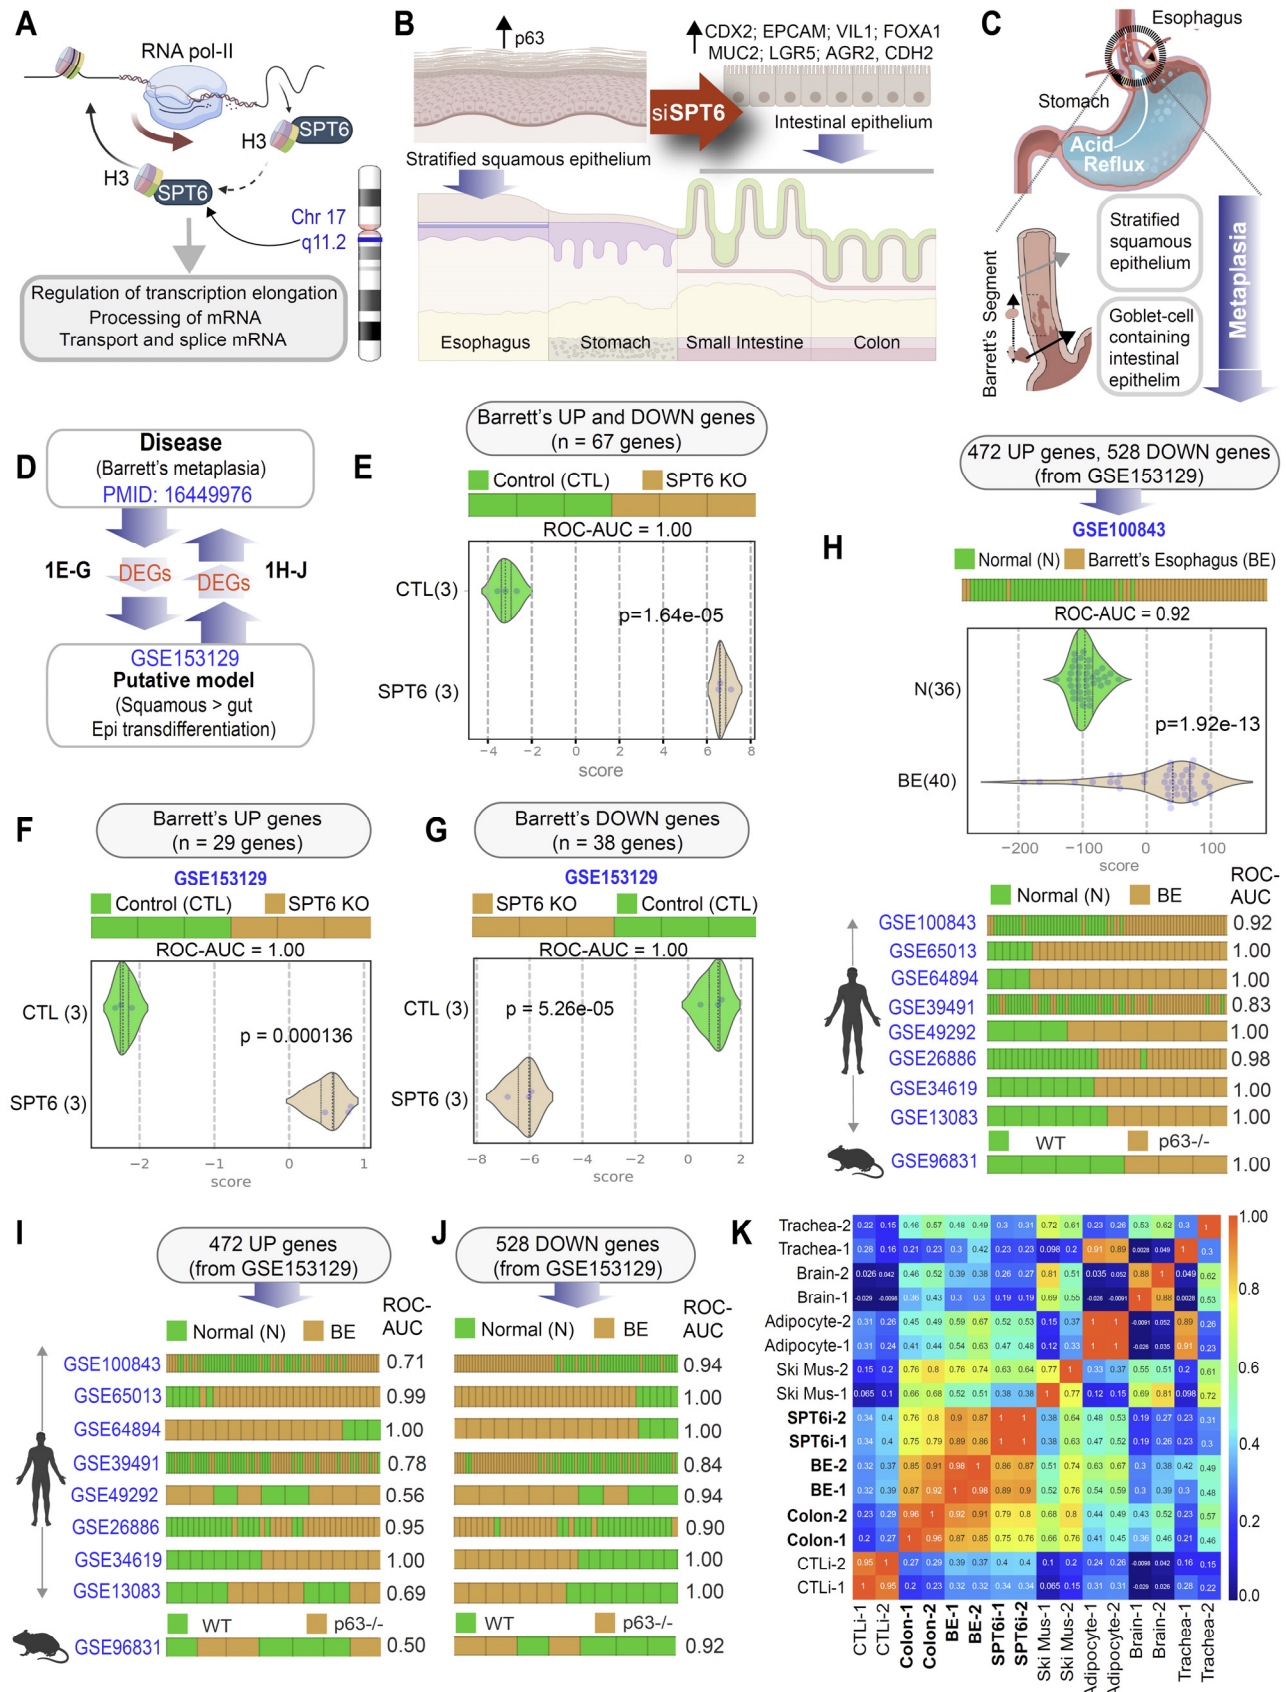

**Figure 1. Keratinocyte stem cells depleted of SPT6 trans-differentiates into gut lineage that resembles Barrett's metaplasia. A.** Schematic summarizes the chromosomal location of SPT6 and its known functions in

transcriptional elongation and mRNA processing. Spt6 coordinates nucleosome dis- and re-assembly, transcriptional elongation, and mRNA processing. Spt6 is a conserved factor that controls transcription and chromatin structure across the genome. **B.** Schematic summarizing the key findings in gene expression and epithelial morphology observed and reported by Li et al., upon depletion of SPT6 in keratinocyte stem cells by siRNA<sup>1</sup>. While control keratinocytes formed stratified squamous epithelium, SPT6-depleted keratinocytes (siSPT6-treated) grew as intestine-like monolayers. **C.** Schematic showing the only known human pathophysiologic context in which stratified squamous epithelium is known to be replaced by intestine-like epithelium. **D.** Summary of computational approach used in panels 1E-J. **E-G.** Differentially expressed genes (DEGs) in Barrett's metaplasia vs. normal esophagus were used to rank order control and SPT6-depleted samples, either using UP genes alone (F), DOWN-genes alone (G) or both UP and DOWN signatures together (E). Results are presented as bar plots. ROC AUC in all cases reflects a perfect strength of classification (1.00). **H-J.** Differentially expressed genes (DEGs) between control (CTL) and SPT6-depleted samples were used to rank order normal (N) from Barrett's esophageal (BE) samples across 8 publicly available independent cohorts, either using UP genes alone (I), DOWN-genes alone (J) or both UP and DOWN signatures together (H). See also **Figure S1** for Violin plots for each dataset. ROC AUC in in each case is annotated on the right side of the corresponding bar plots. **K.** Pearson correlation matrix showing clustering of CTLi and SPT6i gene expression signatures with brain, colon, BE, adipocyte, trachea, and skeletal muscle. Replicate RNA-Seq samples are shown for each tissue.

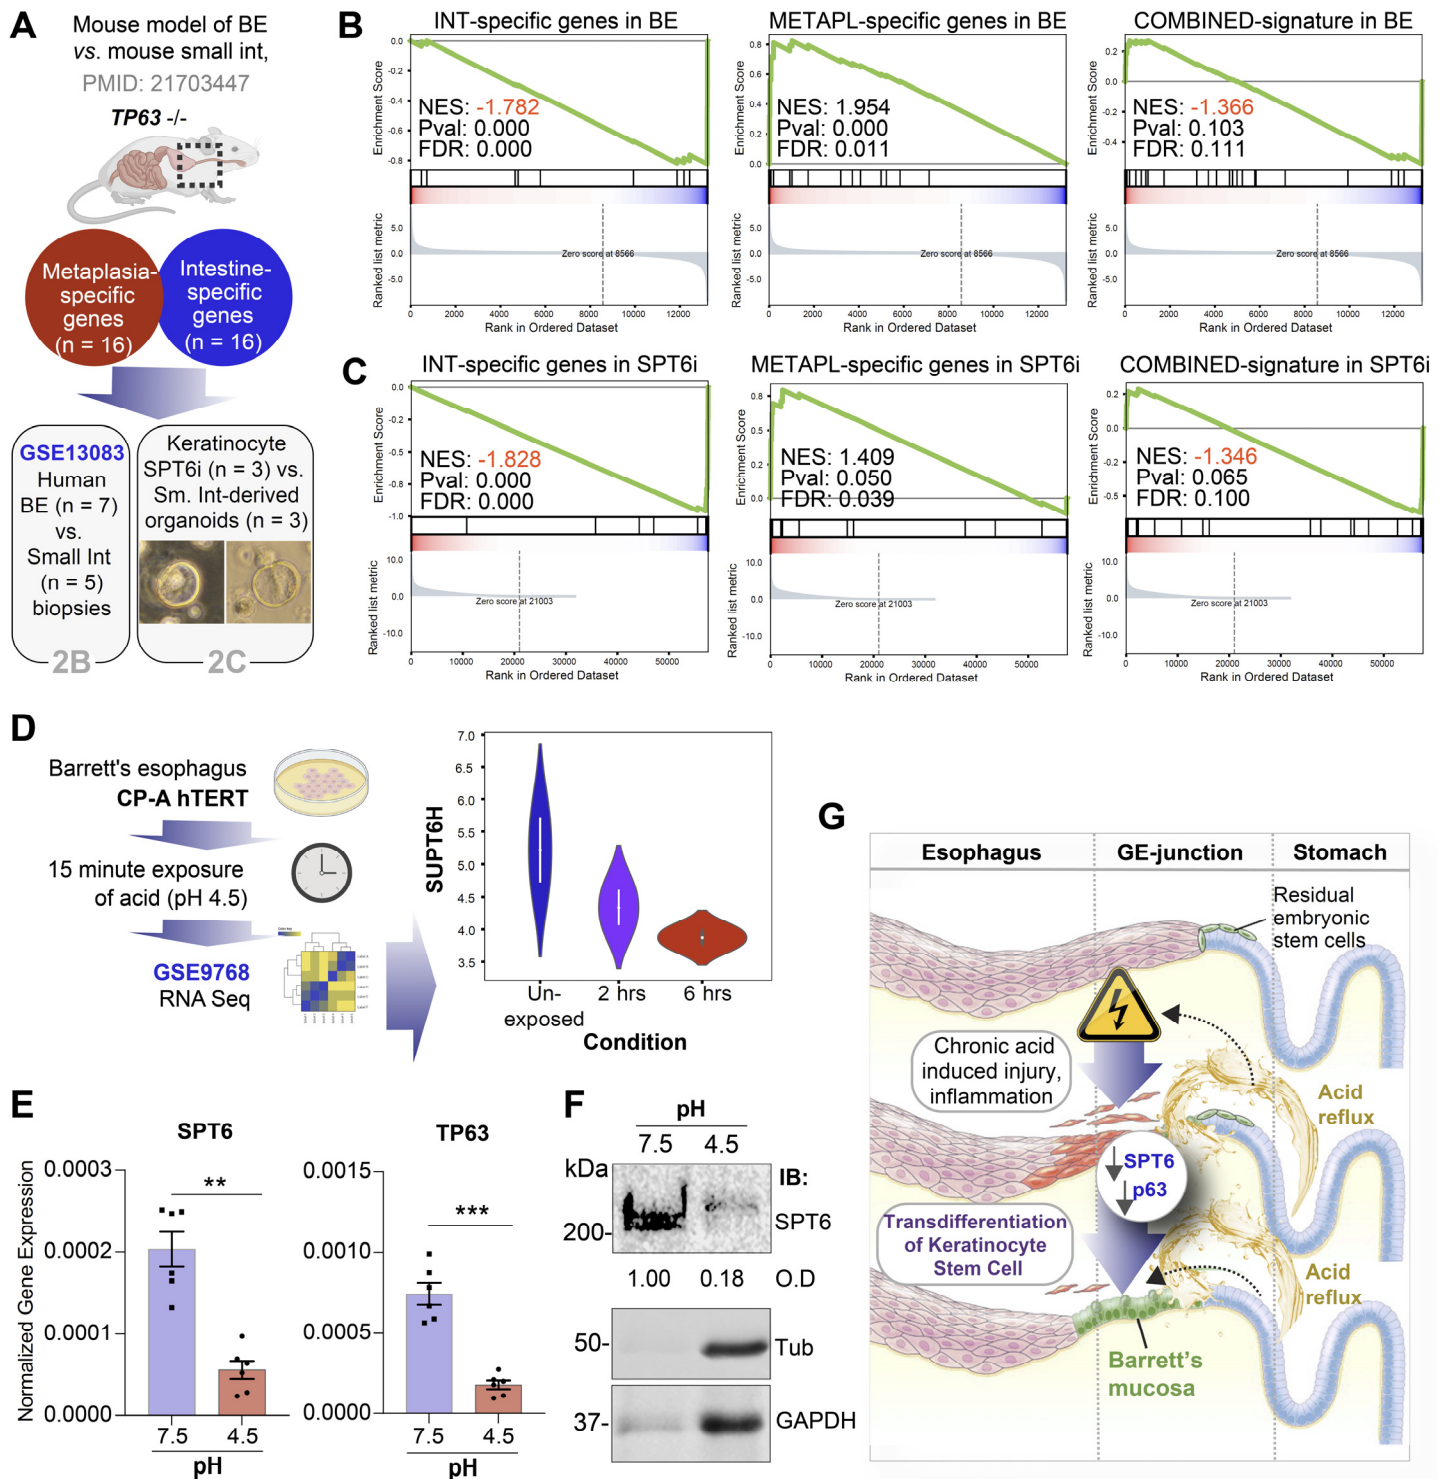

**Figure 2. Downregulation of SPT6 enriches metaplasia-specific genes, and such downregulation can be triggered by low pH.** **A-C.** Schematic in A summarizing the workflow for distinguishing BE from intestine. Using *TP63*<sup>-/-</sup> as a strategy to induce BE in mice, a prior study showed that compared to intestinal tissues, BE tissue was enriched in a 16-gene metaplasia-specific signature and de-enriched in a 16-gene intestine-specific signature. These gene sets were analyzed for enrichment in human BE vs. small intestine tissues (GSE13083; B) and SPT6KO vs. small intestine-derived organoids (C). **D.** Publicly available RNA Seq datasets from esophageal epithelial cells (immortalized with hTERT) treated with pH 4.5 for 2 and 6 h were analyzed for SPT6



expression. **E.** Bar graphs display the relative expression of SPT6 and TP63 in primary keratinocytes exposed to pH 7.5 or 4.5, as determined by qPCR. Error bars represent S.E.M. Significance as determined by t-test,  $p = ** < 0.01$ ;  $*** < 0.001$ .  $n = 3$ . **F.** Immunoblot (IB) of equal aliquots (~50  $\mu\text{g}$ ) of whole cell lysates of the keratinocytes in E. O.D = optical density, as determined by band densitometry. **G.** Schematic summarizing the evidence we present here, showing the keratinocyte stem cell as the cell of origin of BE; upon chronic acid (low pH) injury, SPT6 is downregulated in the keratinocyte stem cells. SPT6 loss causes the spontaneous transdifferentiation of epidermal cells into Barrett's metaplasia. Li et al., demonstrated that such transdifferentiation was due to the stalled transcription of the master regulator of epidermal fate p63.

## Methods

---

Detailed methods for computational and experimental approaches are presented in Supplementary Online Materials.

## Acknowledgements

---

We thank George Sen for transparent communications and for providing access to reagents. This paper was supported by NIH AI141630 and CA100768 (to P.G), GM138385 (to D.S) and AI155696, UG3TR003355 and UG3TR002968 (to D.S, P.G and S.D).

## Author contributions

---

D.V carried out the computational analysis, with supervision from D.S and P.G. M.F and C.T carried out the studies on 3D organoids under the supervision of S.D and P.G. D.S., S.D. and P.G. provided transdisciplinary expertise, resources, and wrote and edited the manuscript. P.G conceived and directed the project.

## Competing interests

---

The authors declare no competing interests.

## Data availability

---

All raw data is provided.

## Code availability

---

The source code is available at <https://github.com/sahoo00/BoNE>. A bash script scr-be is provided to download all the datasets from our Hegemon web server using a perl script. A Jupyter notebook BE-Analysis.ipynb is provided to perform the analysis and generate the figures in this manuscript.

## References

---

1. Li, J., *et al.* SPT6 promotes epidermal differentiation and blockade of an intestinal-like phenotype through control of transcriptional elongation. *Nat Commun* **12**, 784 (2021).
2. Wang, X., *et al.* Residual embryonic cells as precursors of a Barrett's-like metaplasia. *Cell* **145**, 1023-1035 (2011).
3. Truong, A.B., Kretz, M., Ridky, T.W., Kimmel, R. & Khavari, P.A. p63 regulates proliferation and differentiation of developmentally mature keratinocytes. *Genes Dev* **20**, 3185-3197 (2006).
4. Yang, A., *et al.* p63 is essential for regenerative proliferation in limb, craniofacial and epithelial development. *Nature* **398**, 714-718 (1999).
5. Senoo, M., Pinto, F., Crum, C.P. & McKeon, F. p63 is essential for the proliferative potential of stem cells in stratified epithelia. *Cell* **129**, 523-536 (2007).
6. Crum, C.P. & McKeon, F.D. p63 in epithelial survival, germ cell surveillance, and neoplasia. *Annu Rev Pathol* **5**, 349-371 (2010).
7. Daniely, Y., *et al.* Critical role of p63 in the development of a normal esophageal and tracheobronchial epithelium. *Am J Physiol Cell Physiol* **287**, C171-181 (2004).
8. Stairs, D.B., *et al.* Cdx1 and c-Myc foster the initiation of transdifferentiation of the normal esophageal squamous epithelium toward Barrett's esophagus. *PLoS One* **3**, e3534 (2008).
9. Roman, S., *et al.* Downregulation of p63 upon exposure to bile salts and acid in normal and cancer esophageal cells in culture. *Am J Physiol Gastrointest Liver Physiol* **293**, G45-53 (2007).
10. Sato, T., *et al.* Long-term expansion of epithelial organoids from human colon, adenoma, adenocarcinoma, and Barrett's epithelium. *Gastroenterology* **141**, 1762-1772 (2011).
11. Kong, J., *et al.* Induction of intestinalization in human esophageal keratinocytes is a multistep process. *Carcinogenesis* **30**, 122-130 (2009).
12. Dvorak, K., *et al.* Molecular mechanisms of Barrett's esophagus and adenocarcinoma. *Ann N Y Acad Sci* **1232**, 381-391 (2011).
13. Chen, H., *et al.* Molecular mechanisms of Barrett's esophagus. *Dig Dis Sci* **56**, 3405-3420 (2011).
14. Fitzgerald, R.C., Omary, M.B. & Triadafilopoulos, G. Dynamic effects of acid on Barrett's esophagus. An ex vivo proliferation and differentiation model. *J Clin Invest* **98**, 2120-2128 (1996).
15. Souza, R.F., Shewmake, K., Terada, L.S. & Spechler, S.J. Acid exposure activates the mitogen-activated protein kinase pathways in Barrett's esophagus. *Gastroenterology* **122**, 299-307 (2002).
16. Swift, A., *et al.* Frequent loss of heterozygosity on chromosome 17 at 17q11.2-q12 in Barrett's adenocarcinoma. *Br J Cancer* **71**, 995-998 (1995).
17. Dunn, J.R., *et al.* The evolution of loss of heterozygosity on chromosome 17 during the progression to Barrett's adenocarcinoma involves a unique combination of target sites in individual specimens. *Clin Cancer Res* **6**, 4033-4042 (2000).
18. Dunn, J., *et al.* Multiple target sites of allelic imbalance on chromosome 17 in Barrett's oesophageal cancer. *Oncogene* **18**, 987-993 (1999).
19. Kastelein, F., *et al.* Aberrant p53 protein expression is associated with an increased risk of neoplastic progression in patients with Barrett's oesophagus. *Gut* **62**, 1676-1683 (2013).
20. Petty, E.M., Kalikin, L.M., Orringer, M.B. & Beer, D.G. Distal chromosome 17q loss in Barrett's esophageal and gastric cardia adenocarcinomas: implications for tumorigenesis. *Mol Carcinog* **22**, 222-228 (1998).
